# Supplementary material for: A ‘through-DNA’ mechanism for co-regulation of metal uptake and efflux
Source: PubMed Central journal article supplement — Nat Commun. 2024 Dec 4;15:10555. doi: 10.1038/s41467-024-55017-z (PMC11618457; doi:10.1038/s41467-024-55017-z), 2024-12-04
Supplement: 41467_2024_55017_MOESM2_ESM.pdf [file 41467_2024_55017_MOESM2_ESM.pdf]

## **Description of Additional Supplementary Files:**

**Supplementary Software 1:** These Matlab codes are suited for the analysis of single-molecule FRET experiments, which was carried out in the research paper entitled "A 'through-DNA' mechanism for co-regulation of metal uptake and efflux"
